# Supplementary material for: Insight into the internal structure of amyloid-β oligomers by isotope-edited Fourier transform infrared spectroscopy
Source: Royal Society of Chemistry journal article supplement (doi:10.1039/c9cp00717b), 2019-01-01
Supplement: c9cp00717b1.pdf [file c9cp00717b1.pdf]

## Insight into the internal structure of amyloid- $\beta$ oligomers by isotope-edited Fourier transform infrared spectroscopy

Cesare M. Baronio, Maurizio Baldassarre, Andreas Barth

Table S1. Band positions and band areas of the component bands of the fits to the amide I spectra of A $\beta$ <sub>40</sub> and A $\beta$ <sub>42</sub>. Three independent samples of each peptide were measured and co-fitted with Savitzky-Golay windows of 9, 13, and 17 data points, which gave in total nine fits for each peptide. All results were averaged and the standard deviations determined. The total area assigned to  $\beta$ -sheets is 28% for A $\beta$ <sub>40</sub> and 39% for A $\beta$ <sub>42</sub>. The bands assigned to  $\beta$ -sheets are indicated by bold print.

|                         | Band position $\pm$ standard deviation / $\text{cm}^{-1}$ | Band area $\pm$ standard deviation /% |
|-------------------------|-----------------------------------------------------------|---------------------------------------|
| A $\beta$ <sub>40</sub> | <b>1685.0 <math>\pm</math> 0.1</b>                        | <b>2.1 <math>\pm</math> 0.6</b>       |
|                         | 1677.0 $\pm$ 1.9                                          | 7.5 $\pm$ 3.0                         |
|                         | 1661.3 $\pm$ 2.2                                          | 24.4 $\pm$ 3.7                        |
|                         | 1642.1 $\pm$ 1.1                                          | 39.7 $\pm$ 4.4                        |
|                         | <b>1624.3 <math>\pm</math> 0.4</b>                        | <b>22.0 <math>\pm</math> 2.0</b>      |
|                         | <b>1622.1 <math>\pm</math> 0.1</b>                        | <b>4.2 <math>\pm</math> 0.8</b>       |
| A $\beta$ <sub>42</sub> | <b>1685.4 <math>\pm</math> 0.2</b>                        | <b>1.4 <math>\pm</math> 0.5</b>       |
|                         | 1679.8 $\pm$ 1.2                                          | 4.0 $\pm$ 1.6                         |
|                         | 1665.5 $\pm$ 3.9                                          | 18.4 $\pm$ 4.5                        |
|                         | 1644.2 $\pm$ 3.2                                          | 38.6 $\pm$ 4.7                        |
|                         | <b>1626.5 <math>\pm</math> 0.9</b>                        | <b>32.9 <math>\pm</math> 5.9</b>      |
|                         | <b>1624.6 <math>\pm</math> 0.2</b>                        | <b>4.6 <math>\pm</math> 1.3</b>       |

Table S2. PDB files and residues used to create  $\beta$ -barrel models

| PDB file | Type of structure | Number of strands | Residues                                                                                                                                                                                                                                         |
|----------|-------------------|-------------------|--------------------------------------------------------------------------------------------------------------------------------------------------------------------------------------------------------------------------------------------------|
| 1QJP     | Barrel            | 8                 | A6-A15; A36-A45; A48-A57; A77-A86; A91-A100; A122-A131; A134-A143; A161-A170                                                                                                                                                                     |
| 1I78     | Barrel            | 10                | A11-A20; A50-A59; A63-A72; A111-A120; A126-A135; A180-A189; A191-A200; A232-A241; A244-A253; A288-A297                                                                                                                                           |
| 1K24     | Barrel            | 10                | A10-A19; A32-A41; A50-A59; A88-A97; A110-A119; A135-A144; A157-A166; A187-A196; A209-A218; A242-A251                                                                                                                                             |
| 1UYN     | Barrel            | 12                | X819-X828; X845-X854; X857-X866; X884 X893; X897-X906; X931-X940; X948-X957; X986-X995; X1000-X1009; X1043-X1052; X1057-X1066; X1074-X1083                                                                                                       |
| 1QD6     | Barrel            | 12                | C38-C46; C64-C73; C90-C99; C110-C119; C136-C145; C154-C163; C170-C179; C194-C203; C206-C215; C220-C229; C236-C245; C256-C265                                                                                                                     |
| 1T16     | Barrel            | 14                | A43-A52; A79-A88; A91-A99; A126-A135; A139-A148; A208-A217; A220-A229; A274-A283; A286-A295; A326-A335; A338-A347; A368-A377; A380-A389; A412-A421                                                                                               |
| 1OPF     | Barrel            | 16                | A11-A23; A36-A48; A57-A67; A80-A89; A94-A100; A135-A143; A150-A159; A172-A182; A184-A193; A213-A222; A224-A233; A255-A264; A268-A278; A292-A303; A307-A317; A331-A340                                                                            |
| 1OPF     | Barrel            | 16                | A12-A21; A38-A47; A58-A67; A80-A89; A94-A100; A134-A143; A150-A159; A173-A182; A184-A193; A213-A222; A224-A233; A255-A264; A269-A278; A293-A302; A307-A316; A331-A340                                                                            |
| 1A06     | Barrel            | 18                | P74-P84; P117-P126; P135-P144; P159-P168; P180-P186; P208-P215; P222-P230; P244-P253; P255-P264; P286-P296; P306-P317; P335-P345; P352-P362; P373-P383; P390-P400; P416-P426; P439-P449; P472-P483                                               |
| 1FEP     | Barrel            | 22                | A154-A163; A172-A181; A188-A197; A230-A238; A246-A255; A286-A295; A302-A311; A344-A353; A362-A371; A409-A418; A425-A434; A441-A450; A457-A466; A507-A516; A522-A531; A563-A572; A579-A588; A604-A613; A620-A629; A655-A664; A669-A678; A715-A724 |
| 1NQE     | Barrel            | 22                | A137-A146; A149-A158; A165-A174; A199-A208; A215-A224; A247-A256; A262-A271; A295-A304; A310-A319; A337-A346; A352-A361; A368-A377; A384-A393; A415-A424; A429-A438; A461-A470; A476-A485; A500-A509; A515-A524; A544-A553; A558-A567; A585-A594 |

Table S3. 0.1→ 1 <sup>13</sup>C-band shifts. The parameters were adjusted so that they matched the spectra of the Aβ<sub>40</sub> oligomers. The angle of dipole derivative was 10°

| Structure                             | Dipole derivative magnitude (D Å <sup>-1</sup> amu <sup>-1/2</sup> ) | Center wavenumber (cm <sup>-1</sup> ) | <sup>13</sup> C shift (cm <sup>-1</sup> ) for building block ± standard deviation (only for average values) |
|---------------------------------------|----------------------------------------------------------------------|---------------------------------------|-------------------------------------------------------------------------------------------------------------|
| Sheet, 4 strands, 10 residues/strand  | 3.507                                                                | 1652.9                                | Single strand: 15.6                                                                                         |
|                                       |                                                                      |                                       | 2-strand block: 7.6                                                                                         |
| Sheet, 6 strands, 10 residues/strand  | 3.220                                                                | 1654.5                                | Single strand: 16.7                                                                                         |
|                                       |                                                                      |                                       | 2-strand block: 10.1                                                                                        |
|                                       |                                                                      |                                       | 3-strand block: 6.2                                                                                         |
| Sheet, 12 strands, 10 residues/strand | 2.988                                                                | 1656.4                                | Single strand: 18.0                                                                                         |
|                                       |                                                                      |                                       | 2-strand block: 12.3                                                                                        |
|                                       |                                                                      |                                       | 3-strand block: 9.0                                                                                         |
| Sheet, 24 strands, 10 residues/strand | 2.890                                                                | 1657.1                                | Single strand: 18.4                                                                                         |
|                                       |                                                                      |                                       | 2-strand block: 13.2                                                                                        |
|                                       |                                                                      |                                       | 3-strand block: 10.0                                                                                        |
| Barrel, 8 strands, 1QJP               | 3.240                                                                | 1658.7                                | Single strand: 18.7                                                                                         |
|                                       |                                                                      |                                       | 2-strand block: 11.6                                                                                        |
| Barrel, 12 strands, 1UYN              | 3.245                                                                | 1658.2                                | Single strand: 19.1                                                                                         |
|                                       |                                                                      |                                       | 2-strand block: 11.9                                                                                        |
|                                       |                                                                      |                                       | 3-strand block: 7.8                                                                                         |
| Barrel, 18 strands, 1A06              | 3.340                                                                | 1658.8                                | Single strand: 19.7                                                                                         |
|                                       |                                                                      |                                       | 2-strand block: 13.1                                                                                        |
|                                       |                                                                      |                                       | 3-strand block: 9.1                                                                                         |
| Barrel, 22 strands, 1NQE              | 3.174                                                                | 1658.2                                | Single strand: 19.1                                                                                         |
|                                       |                                                                      |                                       | 2-strand block: 12.7                                                                                        |
| <b>Averages</b>                       |                                                                      |                                       | <b>Single strand: 18.2 ± 1.4</b>                                                                            |
|                                       |                                                                      |                                       | <b>2-strand block: 11.6 ± 1.8</b>                                                                           |
|                                       |                                                                      |                                       | <b>3-strand block: 8.4 ± 1.5</b>                                                                            |

Table S4. 0.1→ 1 <sup>13</sup>C-band shifts. The parameters were adjusted so that they matched the spectra of the **AP**<sub>40</sub> oligomers. The angle of dipole derivative was **20°**

| Structure                                                               | Dipole derivative magnitude<br>(D Å <sup>-1</sup> amu <sup>-1/2</sup> ) | Center wavenumber<br>(cm <sup>-1</sup> ) | <sup>13</sup> C shift (cm <sup>-1</sup> ) for building block ± standard deviation (only for average values) |
|-------------------------------------------------------------------------|-------------------------------------------------------------------------|------------------------------------------|-------------------------------------------------------------------------------------------------------------|
| Sheet, 2 strands, 10 residues/strand<br>(not considered in the average) | 4.929                                                                   | 1653.2                                   | Single strand: 12.5                                                                                         |
| Sheet, 3 strands, 10 residues/strand<br>(not considered in the average) | 3.910                                                                   | 1654.1                                   | Single strand: 15.6                                                                                         |
| Sheet, 4 strands, 10 residues/strand                                    | 3.557                                                                   | 1655.4                                   | Single strand: 16.7                                                                                         |
|                                                                         |                                                                         |                                          | 2-strand block: 8.3                                                                                         |
|                                                                         |                                                                         |                                          | Interlaced model 1: 11.4                                                                                    |
| Sheet, 6 strands, 10 residues/strand                                    | 3.270                                                                   | 1656.7                                   | Single strand: 17.8                                                                                         |
|                                                                         |                                                                         |                                          | 2-strand block: 10.6                                                                                        |
|                                                                         |                                                                         |                                          | 3-strand block: 6.3                                                                                         |
|                                                                         |                                                                         |                                          | Interlaced model 2: 15.1                                                                                    |
| Sheet, 6 strands, 6 residues/strand                                     | 3.285                                                                   | 1657.4                                   | Single strand: 17.6                                                                                         |
| Sheet, 6 strands, 4 residues/strand                                     | 3.600                                                                   | 1658.2                                   | Single strand: 17.3                                                                                         |
| Sheet, 12 strands, 10 residues/strand                                   | 3.032                                                                   | 1658.3                                   | Single strand: 18.8                                                                                         |
|                                                                         |                                                                         |                                          | 2-strand block: 12.7                                                                                        |
|                                                                         |                                                                         |                                          | 3-strand block: 9.1                                                                                         |
|                                                                         |                                                                         |                                          | Interlaced model 1: 15.6                                                                                    |
|                                                                         |                                                                         |                                          | Interlaced model 2: 16.9                                                                                    |
| Sheet, 12 strands, 6 residues/strand                                    | 3.095                                                                   | 1658.5                                   | Single strand: 18.4                                                                                         |
| Sheet, 24 strands, 10 residues/strand                                   | 2.935                                                                   | 1658.3                                   | Single strand: 19.1                                                                                         |
|                                                                         |                                                                         |                                          | 2-strand block: 13.5                                                                                        |
|                                                                         |                                                                         |                                          | 3-strand block: 10.1                                                                                        |
|                                                                         |                                                                         |                                          | Interlaced model 1: 16.3                                                                                    |
|                                                                         |                                                                         |                                          | Interlaced model 2: 17.5                                                                                    |
| Barrel, 8 strands, 1QJP                                                 | 3.287                                                                   | 1661.2                                   | Single strand: 19.5                                                                                         |
|                                                                         |                                                                         |                                          | 2-strand block: 12.1                                                                                        |
|                                                                         |                                                                         |                                          | Interlaced model 1: 15.8                                                                                    |
| Barrel, 10 strands, 1I78                                                | 3.330                                                                   | 1660.5                                   | Single strand: 19.6                                                                                         |
|                                                                         |                                                                         |                                          | 2-strand block: 12.1                                                                                        |
| Barrel, 10 strands, 1K24                                                | 3.310                                                                   | 1662.2                                   | Single strand: 19.9                                                                                         |
|                                                                         |                                                                         |                                          | 2-strand block: 12.6                                                                                        |
| Barrel, 12 strands, 1UYN                                                | 3.285                                                                   | 1660.7                                   | Single strand: 19.9                                                                                         |
|                                                                         |                                                                         |                                          | 2-strand block: 12.3                                                                                        |
|                                                                         |                                                                         |                                          | 3-strand block: 7.8                                                                                         |
|                                                                         |                                                                         |                                          | Interlaced model 1: 15.8                                                                                    |
|                                                                         |                                                                         |                                          | Interlaced model 2: 18.0                                                                                    |
| Barrel, 12 strands, 1QD6                                                | 3.420                                                                   | 1660.2                                   | Single strand: 20.2                                                                                         |
|                                                                         |                                                                         |                                          | 2-strand block: 12.9                                                                                        |
|                                                                         |                                                                         |                                          | 3-strand block: 8.5                                                                                         |
|                                                                         |                                                                         |                                          | Interlaced model 1: 16.6                                                                                    |
|                                                                         |                                                                         |                                          | Interlaced model 2: 18.0                                                                                    |
| Barrel, 14 strands, 1T16                                                | 3.281                                                                   | 1661.3                                   | Single strand: 20.0                                                                                         |
|                                                                         |                                                                         |                                          | 2-strand block: 12.6                                                                                        |

|                                                                                     |       |        |                                       |
|-------------------------------------------------------------------------------------|-------|--------|---------------------------------------|
| Barrel, 16 strands, 1OPF                                                            | 3.313 | 1661.1 | Single strand: 20.0                   |
|                                                                                     |       |        | 2-strand block: 13.1                  |
|                                                                                     |       |        | Interlaced model 1: 16.4              |
| Barrel, 16 strands, 1OPF                                                            | 3.333 | 1661.0 | Single strand: 19.7                   |
|                                                                                     |       |        | 2-strand block: 12.3                  |
|                                                                                     |       |        | Interlaced model 1: 16.1              |
| Barrel, 18 strands, 1A06                                                            | 3.348 | 1660.2 | Single strand: 20.1                   |
|                                                                                     |       |        | 2-strand block: 13.4                  |
|                                                                                     |       |        | 3-strand block: 9.1                   |
| Barrel, 22 strands, 1FEP                                                            | 3.211 | 1660.2 | Single strand: 20.0                   |
|                                                                                     |       |        | 2-strand block: 13.0                  |
|                                                                                     |       |        | Interlaced model 2: 18.3              |
| Barrel, 22 strands, 1NQE                                                            | 3.211 | 1660.6 | Single strand: 20.0                   |
|                                                                                     |       |        | 2-strand block: 13.4                  |
| Dodecamer, 5HOW                                                                     | 3.660 | 1678.0 | (2-strand block): 10.3                |
| <b>Averages of all barrels and sheets with 4 or more strands</b>                    |       |        | <b>Single strand: 19.2 ± 1.1</b>      |
|                                                                                     |       |        | <b>2-strand block: 12.3 ± 1.3</b>     |
|                                                                                     |       |        | <b>3-strand block: 8.5 ± 1.3</b>      |
|                                                                                     |       |        | <b>Interlaced model 1: 15.5 ± 1.8</b> |
|                                                                                     |       |        | <b>Interlaced model 2: 17.3 ± 1.3</b> |
| <b>Averages using the same structures as for the other angles (Table S3 and S5)</b> |       |        | <b>Single strand: 19.0 ± 1.2</b>      |
|                                                                                     |       |        | <b>2-strand block: 12.0 ± 1.8</b>     |
|                                                                                     |       |        | <b>3-strand block: 8.5 ± 1.5</b>      |
|                                                                                     |       |        | <b>Interlaced model 1: 15.0 ± 2.0</b> |
|                                                                                     |       |        | <b>Interlaced model 2: 17.2 ± 1.3</b> |

Table S5. 0.1→ 1 <sup>13</sup>C-band shifts. The parameters were adjusted so that they matched the spectra of the Aβ<sub>40</sub> oligomers. The angle of dipole derivative was 30°

| Structure                             | Dipole derivative magnitude (D Å <sup>-1</sup> amu <sup>-1/2</sup> ) | Center wavenumber (cm <sup>-1</sup> ) | <sup>13</sup> C shift (cm <sup>-1</sup> ) for building block ± standard deviation (only for average values) |
|---------------------------------------|----------------------------------------------------------------------|---------------------------------------|-------------------------------------------------------------------------------------------------------------|
| Sheet, 4 strands, 10 residues/strand  | 3.659                                                                | 1659.4                                | Single strand: 17.9                                                                                         |
|                                       |                                                                      |                                       | 2-strand block: 8.9                                                                                         |
| Sheet, 6 strands, 10 residues/strand  | 3.370                                                                | 1660.2                                | Single strand: 18.8                                                                                         |
|                                       |                                                                      |                                       | 2-strand block: 11.1                                                                                        |
|                                       |                                                                      |                                       | 3-strand block: 6.5                                                                                         |
| Sheet, 12 strands, 10 residues/strand | 3.127                                                                | 1661.2                                | Single strand: 19.8                                                                                         |
|                                       |                                                                      |                                       | 2-strand block: 13.1                                                                                        |
|                                       |                                                                      |                                       | 3-strand block: 9.2                                                                                         |
| Sheet, 24 strands, 10 residues/strand | 3.027                                                                | 1661.5                                | Single strand: 20.0                                                                                         |
|                                       |                                                                      |                                       | 2-strand block: 13.7                                                                                        |
|                                       |                                                                      |                                       | 3-strand block: 10.1                                                                                        |
| Barrel, 8 strands, 1QJP               | 3.445                                                                | 1665.8                                | Single strand: 20.5                                                                                         |
|                                       |                                                                      |                                       | 2-strand block: 12.4                                                                                        |
| Barrel, 12 strands, 1UYN              | 3.475                                                                | 1665.9                                | Single strand: 21.5                                                                                         |
|                                       |                                                                      |                                       | 2-strand block: 13.1                                                                                        |
|                                       |                                                                      |                                       | 3-strand block: 8.0                                                                                         |
| Barrel, 18 strands, 1A06              | 3.463                                                                | 1663.5                                | Single strand: 21.2                                                                                         |
|                                       |                                                                      |                                       | 2-strand block: 14.0                                                                                        |
|                                       |                                                                      |                                       | 3-strand block: 9.3                                                                                         |
| Barrel, 22 strands, 1NQE              | 3.344                                                                | 1664.6                                | Single strand: 21.3                                                                                         |
|                                       |                                                                      |                                       | 2-strand block: 14.1                                                                                        |
| <b>Averages</b>                       |                                                                      |                                       | <b>Single strand: 20.1 ± 1.3</b>                                                                            |
|                                       |                                                                      |                                       | <b>2-strand block: 12.5 ± 1.8</b>                                                                           |
|                                       |                                                                      |                                       | <b>3-strand block: 8.6 ± 1.4</b>                                                                            |

Table S6. 0.1→ 1 <sup>13</sup>C-band shifts. The parameters were adjusted so that they matched the spectra of the Aβ<sub>42</sub> oligomers. The angle of dipole derivative was 20°

| Structure                             | Dipole derivative magnitude (D Å <sup>-1</sup> amu <sup>-1/2</sup> ) | Center wavenumber (cm <sup>-1</sup> ) | <sup>13</sup> C shift (cm <sup>-1</sup> ) for building block |
|---------------------------------------|----------------------------------------------------------------------|---------------------------------------|--------------------------------------------------------------|
| Sheet, 12 strands, 10 residues/strand | 2.868                                                                | 1659.0                                | Single strand: 17.3                                          |
|                                       |                                                                      |                                       | 2-strand block: 11.5                                         |
|                                       |                                                                      |                                       | 3-strand block: 8.2                                          |
| Barrel, 12 strands, 1QD6              | 3.250                                                                | 1660.8                                | Single strand: 18.6                                          |
|                                       |                                                                      |                                       | 2-strand block: 11.7                                         |
|                                       |                                                                      |                                       | 3-strand block: 7.7                                          |
